# Supplementary material for: β-Thalassemia Patients Revealed a Significant Change of Untargeted Metabolites in Comparison to Healthy Individuals
Source: PubMed Central journal article supplement (PMC5304209; doi:10.1038/srep42249), 2017-02-13

1 **β-Thalassemia Patients Revealed a Significant Change of Untargeted**  
2 **Metabolites in Comparison to Healthy Individuals**

3  
4 Syed Ghulam Musharraf,<sup>a,b,\*</sup> Ayesha Iqbal,<sup>b</sup> Saqib Hussain Ansari,<sup>c</sup> Sadia Parveen,<sup>c</sup> Ishtiaq  
5 Ahmad Khan,<sup>b</sup> and Amna Jabbar Siddiqui<sup>a</sup>

6  
7 *<sup>a</sup> H.E.J. Research Institute of Chemistry, International Center for Chemical and Biological*  
8 *Sciences, University of Karachi, Karachi-75270, Pakistan*

9 *<sup>b</sup> Dr. Panjwani Center for Molecular Medicine and Drug Research, International Center for*  
10 *Chemical and Biological Sciences, University of Karachi, Karachi-75270, Pakistan*

11 *<sup>c</sup> Department of Pediatric Hematology & Molecular Medicine, National Institute of Blood*  
12 *Diseases and Bone Marrow Transplantation, Karachi-75300, Pakistan*

13  
14  
15  
16  
17  
18  
19  
20  
21  
22  
23  
24  
25  
26  
27  
28  
29  
30  
31  
32  
33  
34  
35  
36  
37  
38 \* Corresponding author. Tel.: +92 21 34824924-5; 34819010; fax: + 92 21 34819018-9.  
39 *E-mail address:* [musharraf1977@yahoo.com](mailto:musharraf1977@yahoo.com)  
40

41 **Table S1:** Age, gender and weight of healthy normal subjects and  $\beta$ -thalassemia patients  
42  
43

| <b>S. No.</b> | <b>Parameter</b>     | <b><math>\beta</math>-Thalassemia Patients<br/>(n=100)</b> | <b>Healthy<br/>(n=61)</b> |
|---------------|----------------------|------------------------------------------------------------|---------------------------|
| 1.            | Gender (Male/Female) | 51/49                                                      | 29/33                     |
| 2.            | Age (years)          | 9.13 $\pm$ 6.91                                            | 18.73 $\pm$ 7.93          |
| 3.            | Weight (kgs)         | 22.41 $\pm$ 12.91                                          | 47.375 $\pm$ 16.34        |

44  
45

46 **Figure S1:** The EI/MS spectra of unidentified compounds that are statistically differentially expressed  
47 between controls and  $\beta$ -thalassemia patients.

48  
49  
50

**312.0@21.099983**

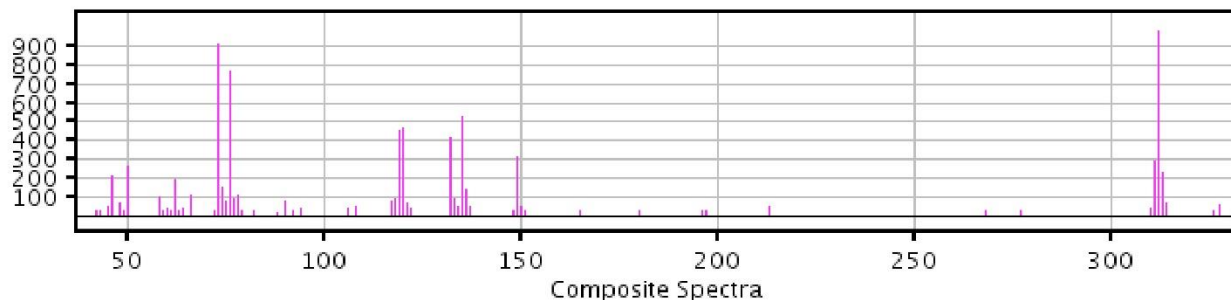

51  
52

**147.0@6.300002**

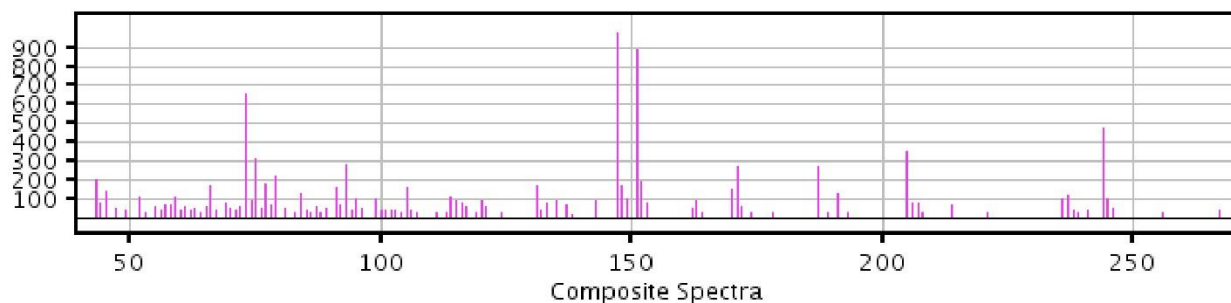

53  
54

**151.0@6.0**

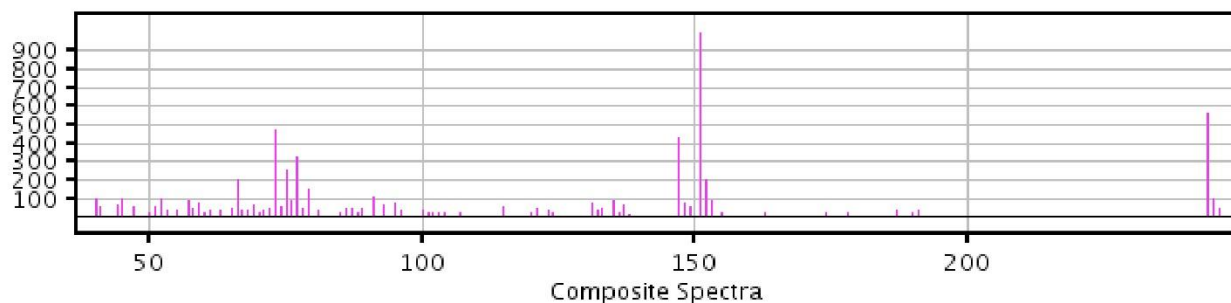

55  
56

**71.0@9.700005**

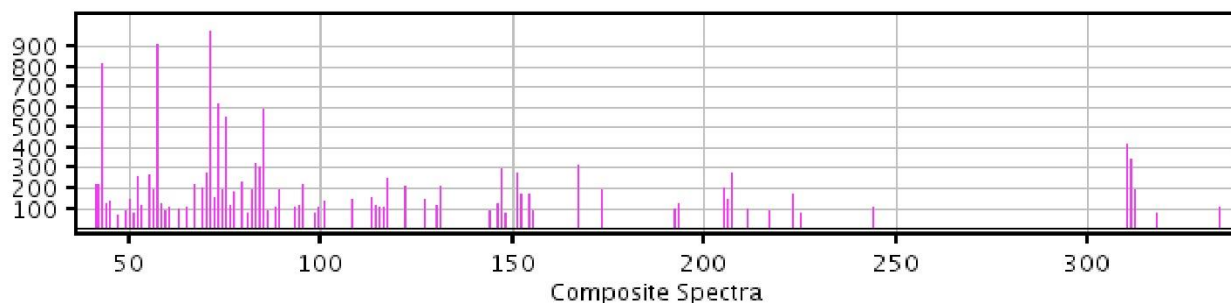

57

58 **77.0@19.5**

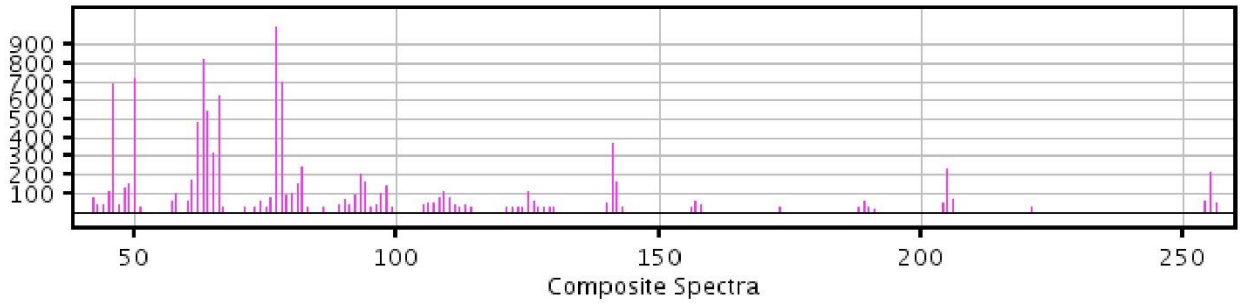

59  
60 **77.0@19.200005**

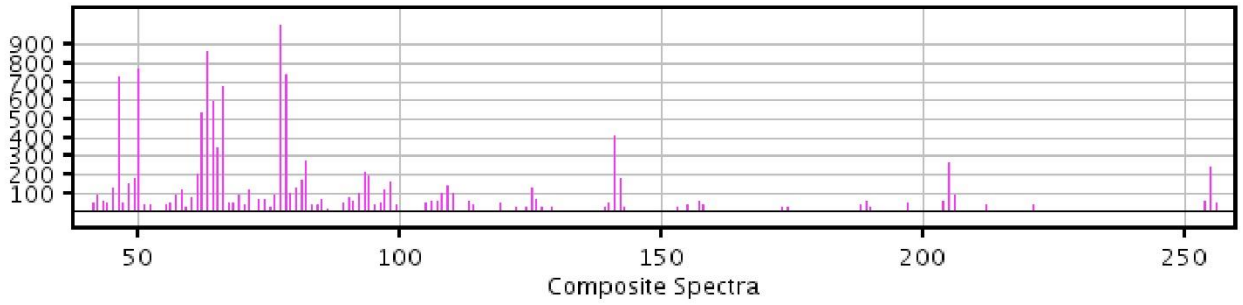

61  
62 **73.0@8.100001**

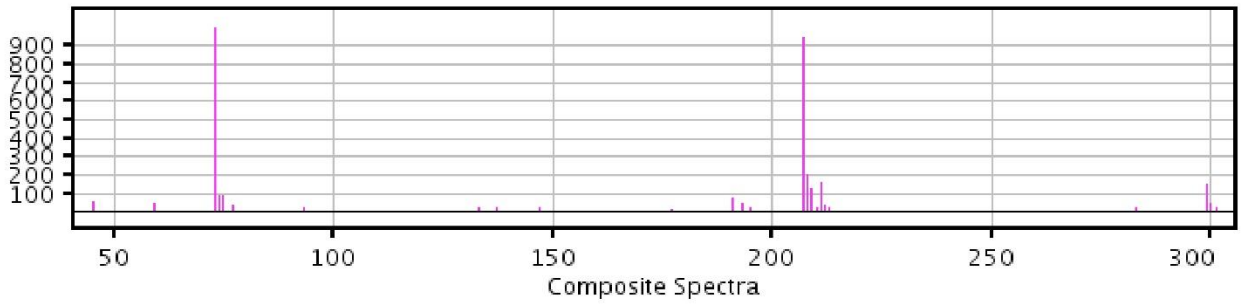

63  
64 **55.0@24.399998**

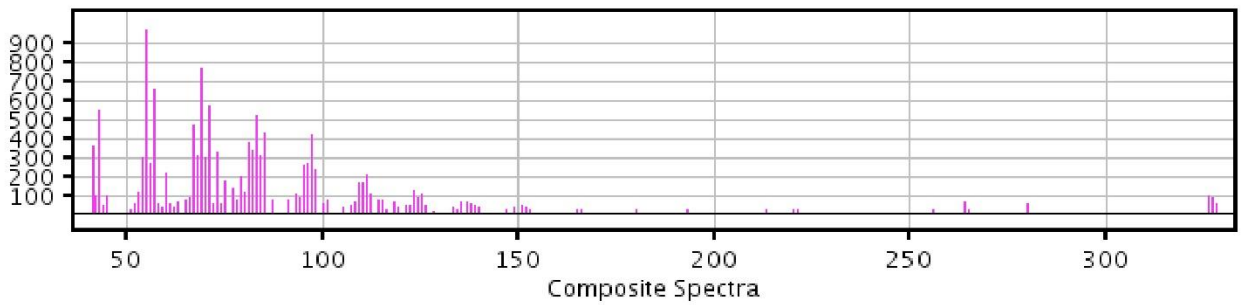

65  
66  
67  
68  
69  
70

71 **71.0@22.79995**

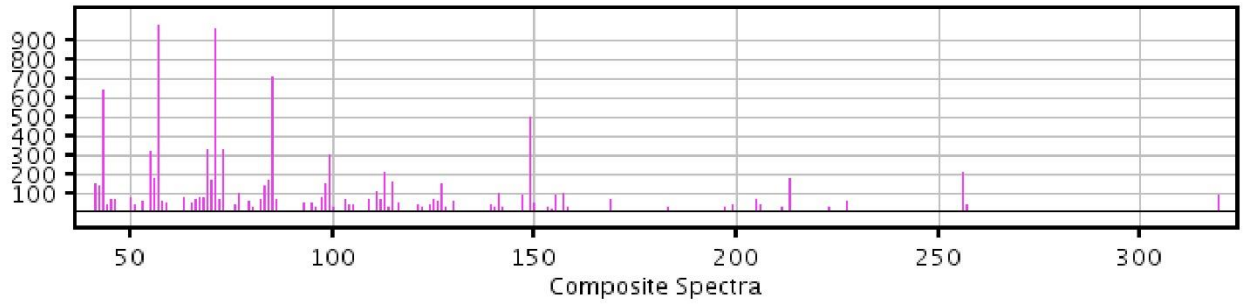

72 **71.0@25.89998**

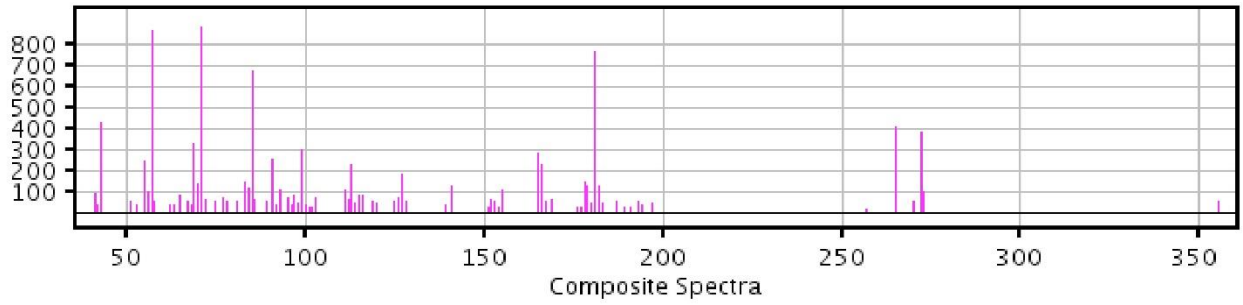

74 **73.0@12.89999**

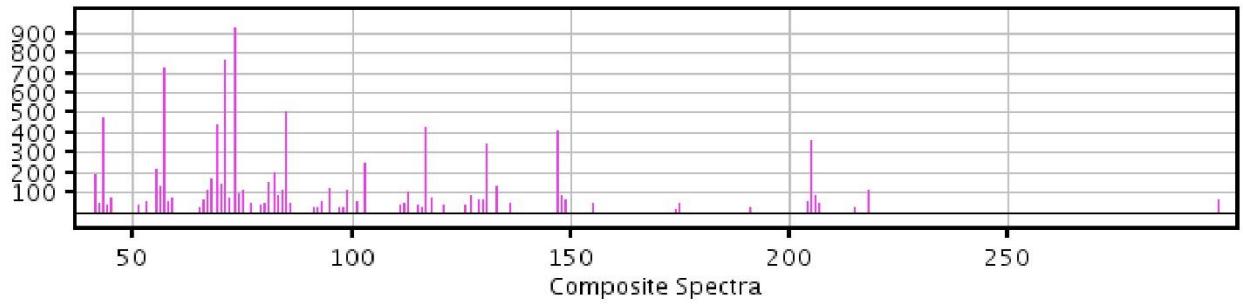

76 **71.0@13.60004**

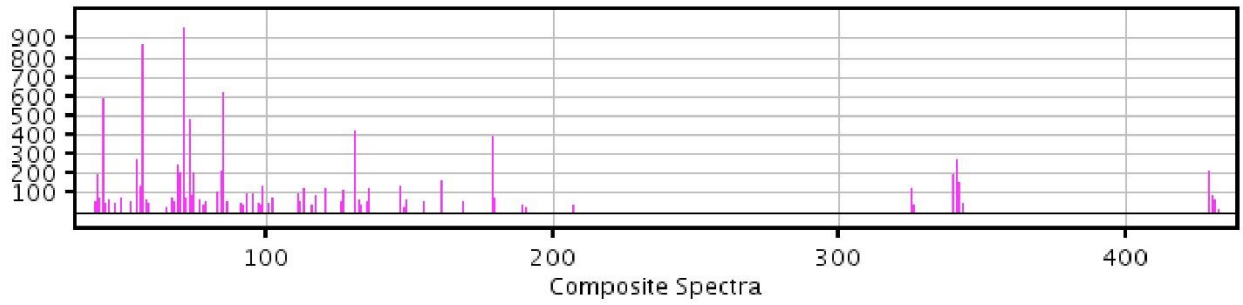

78  
79  
80  
81  
82  
83

84 **57.0@24.600004**

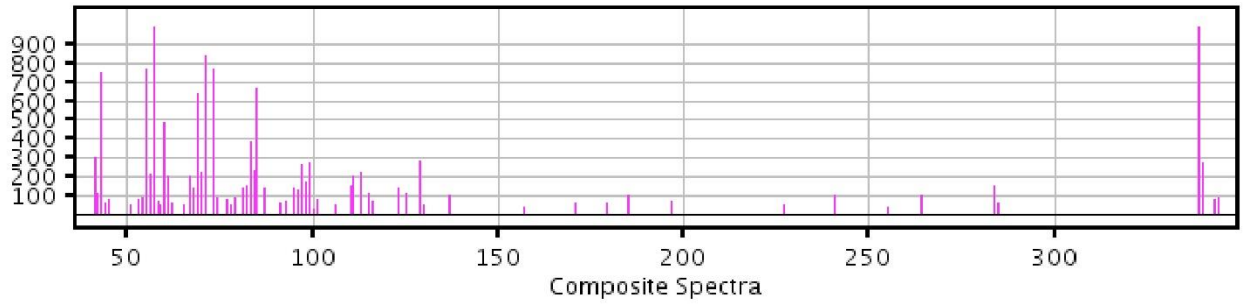

85 **69.0@12.799999**  
86

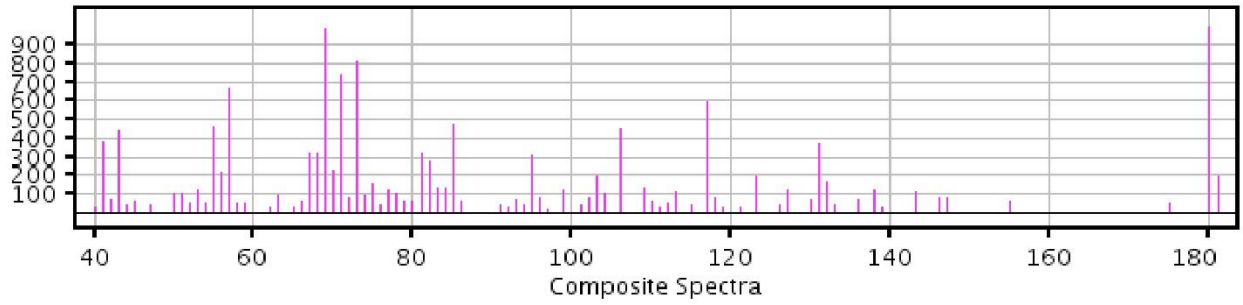

87 **57.0@11.699998**  
88

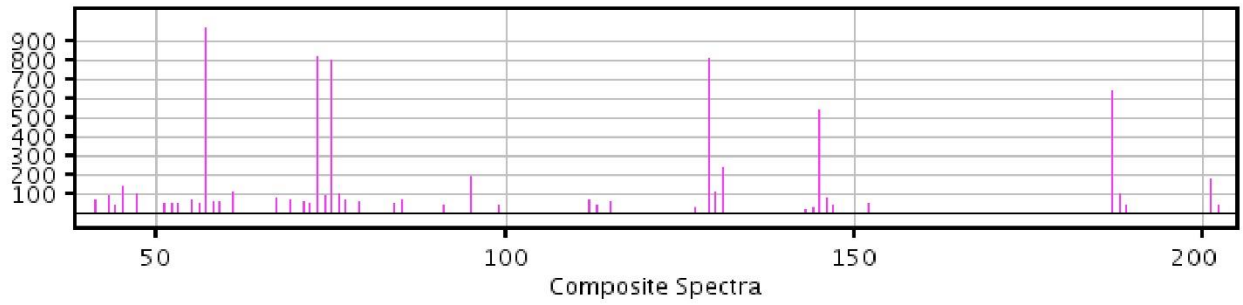

89 **73.0@14.199998**  
90

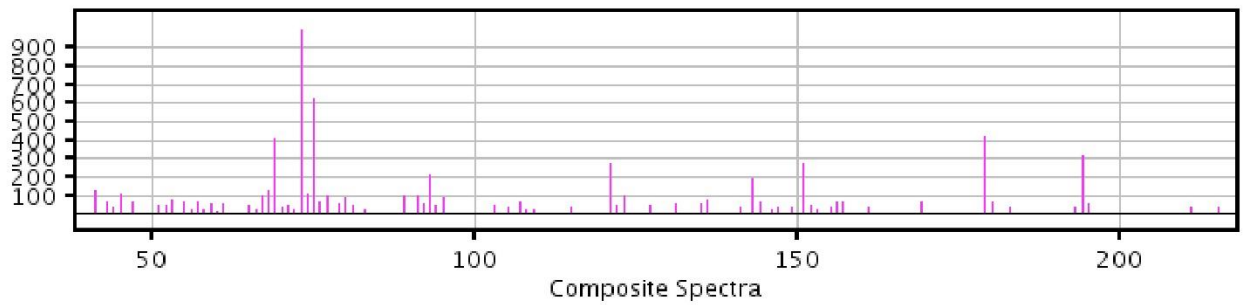

91  
92  
93  
94  
95  
96

97 **73.0@18.5:1**

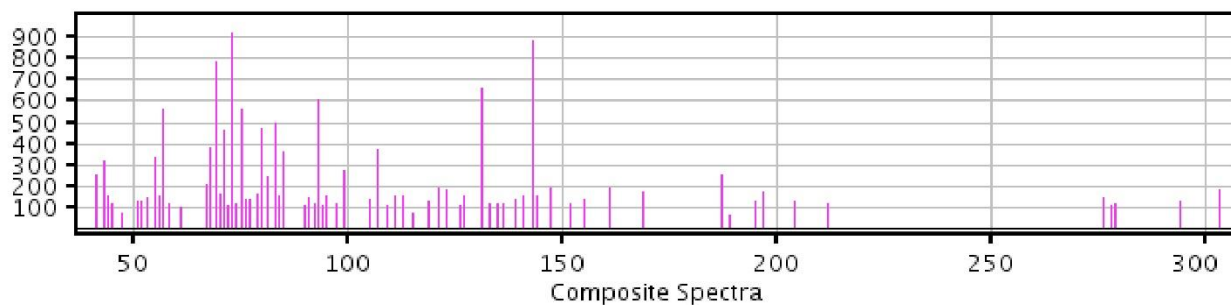

98  
99 **73.0@9.199999**

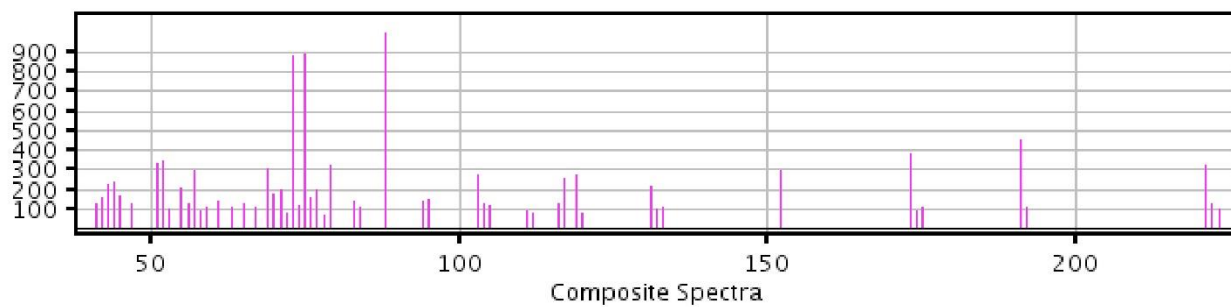

100  
101 **57.0@27.100002**

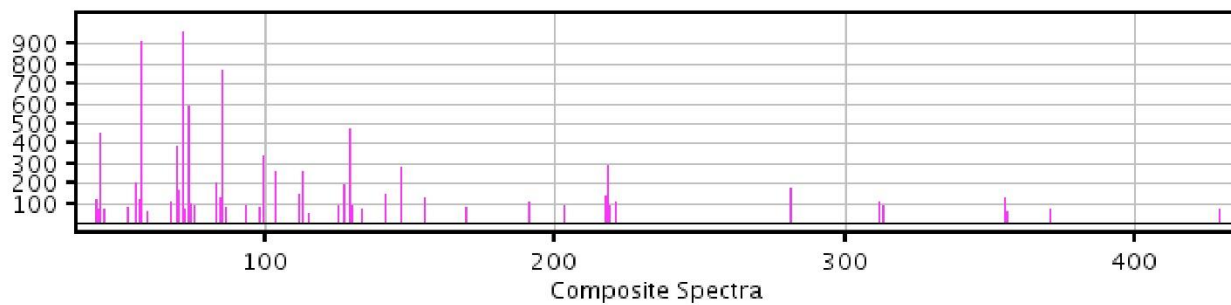

102  
103  
104

105 **Figure S2:** PCA plot showing that samples are not discriminating on the basis of age groups but due to  
106 health status (Group-0 = 0-20 years, Group-1 = 20-30 years). A) Down-regulated metabolites B) Up-  
107 regulated metabolites.  
108

A) Down-regulated Metabolites

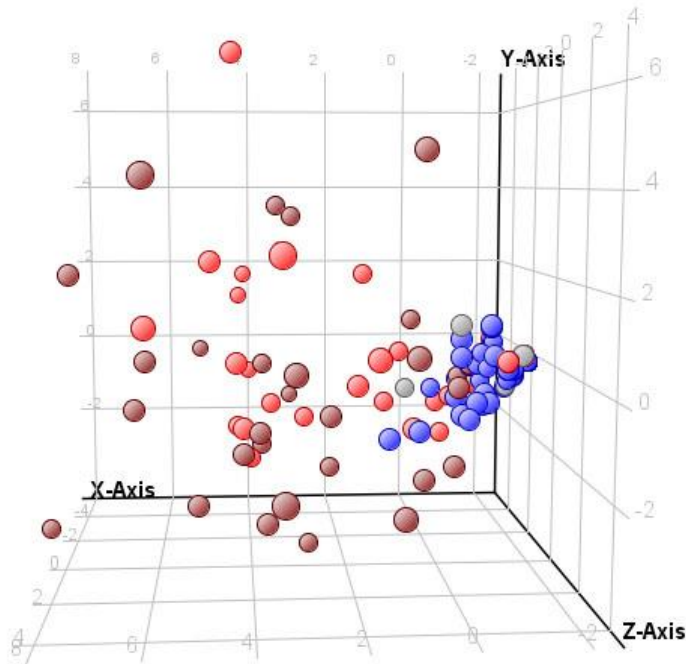

X-axis (Comp 1) = 27.09  
Y-axis (Comp 2) = 7.55  
Z-axis (Comp 3) = 6.96

- Group-0 Healthy
- Group-0 Disease
- Group-1 Healthy
- Group-1 Disease

B) Up-regulated Metabolites

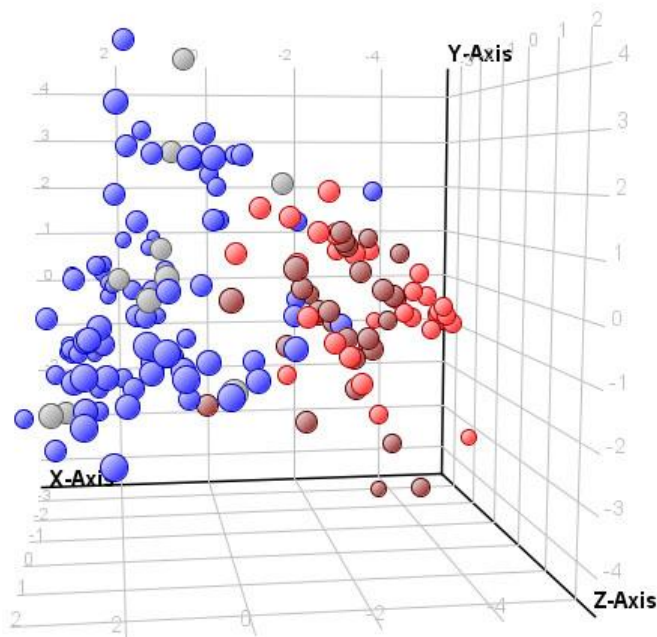

X-axis (Comp 1) = 29.95  
Y-axis (Comp 2) = 12.42  
Z-axis (Comp 3) = 9.15



110 **Figure S3:** PCA plot showing that samples are not discriminating on the basis of body mass but due to  
111 health status. A) Down-regulated metabolites B) Up-regulated metabolites.  
112

A) Down-regulated Metabolites

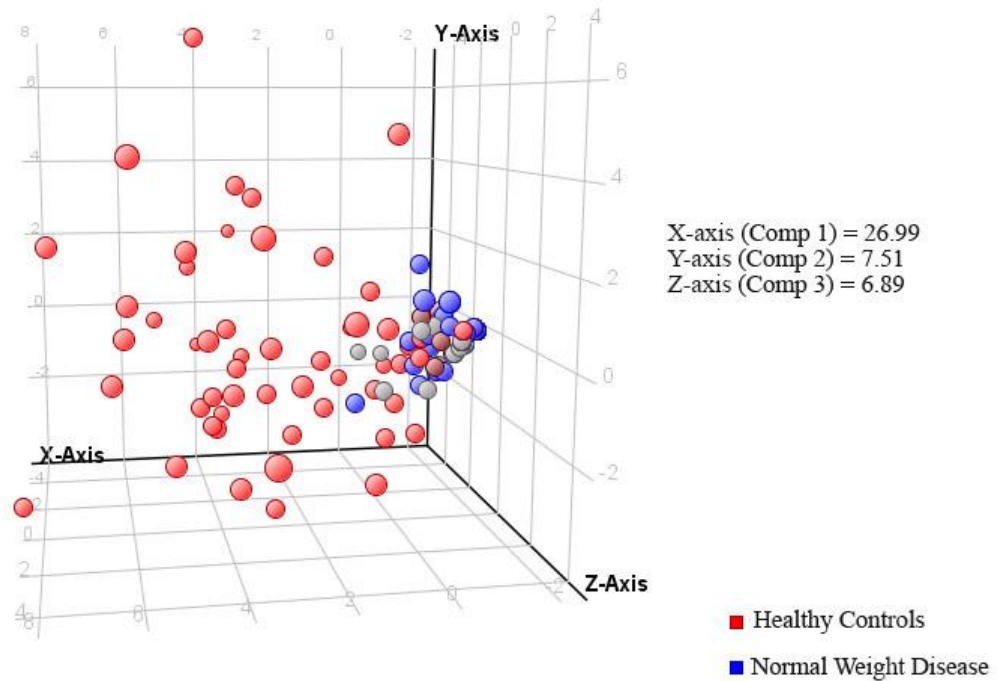

B) Up-regulated Metabolites

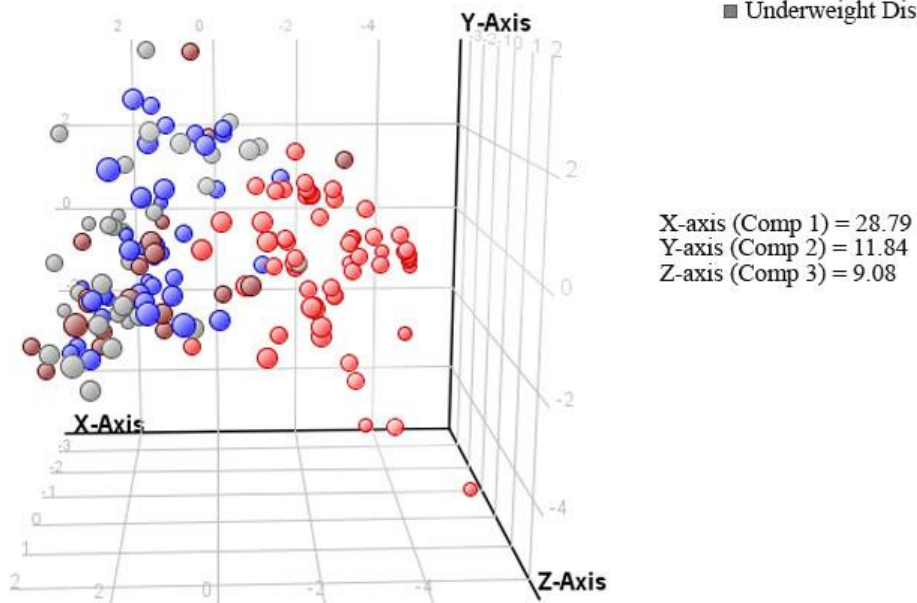

114 **Figure S4:** Model generated PCA scores scatter plots discriminating between healthy controls and  $\beta$ -thalassemia patients.

115  $\blacktriangle$  Healthy Sample  $\blacksquare$  Beta Thalassemia Sample

116

Legend - PCA Score Plot

Color by Samples

$\blacksquare$  InputSample

$\blacktriangle$  ModelSample

117

118

119

Disease

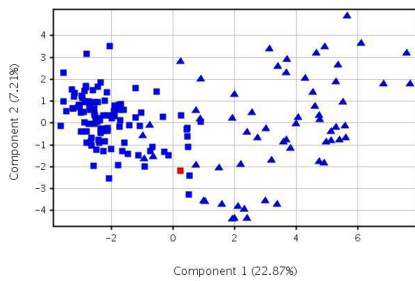

Disease

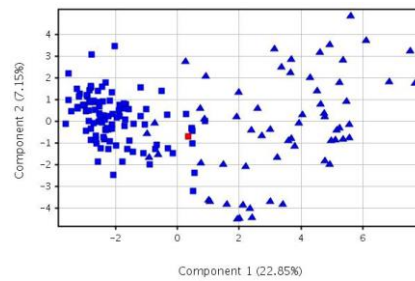

Disease

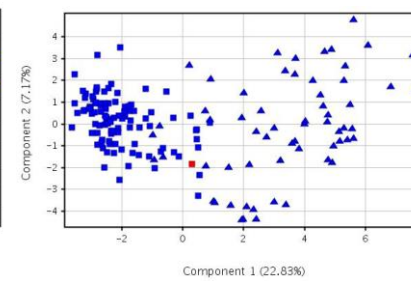

Healthy

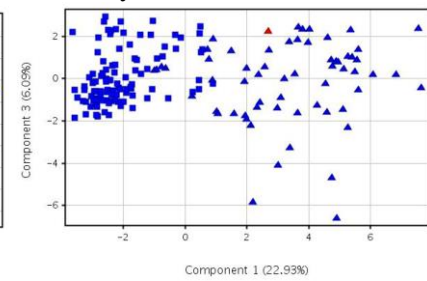

120

121

122

123

Disease

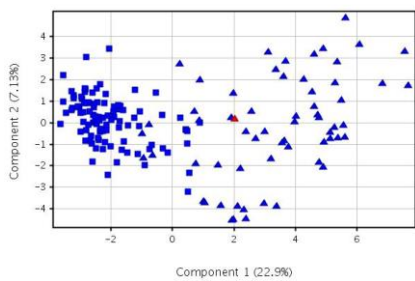

Disease

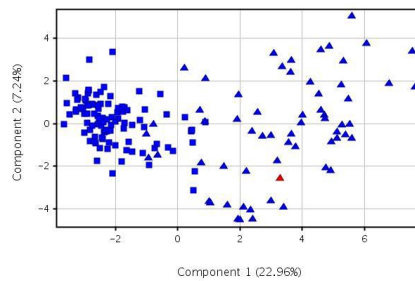

Disease

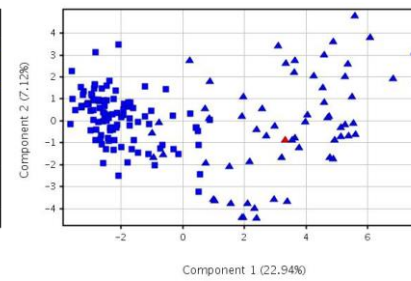

Healthy

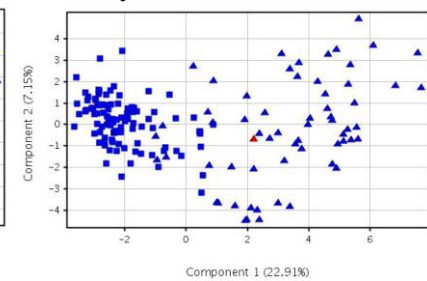

124

125

126

127

128

129

130

131

132

Disease

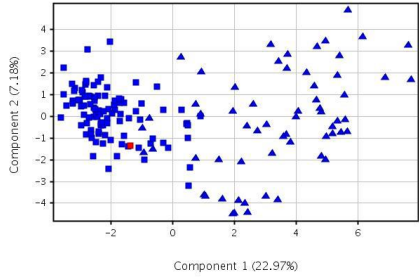

Healthy

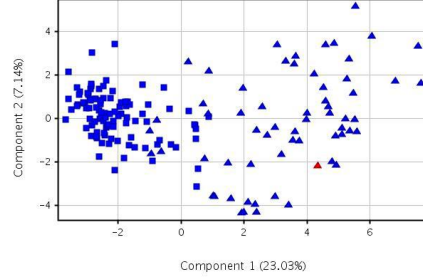

Healthy

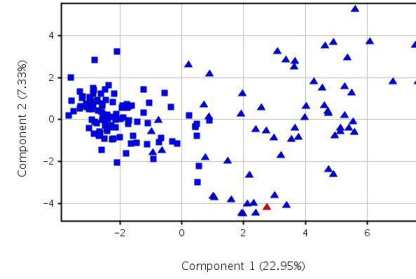

Healthy

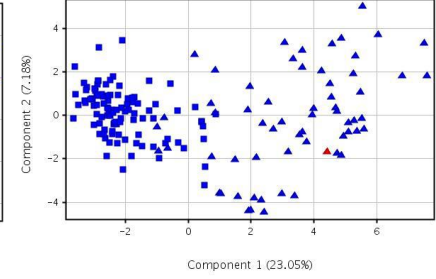

133

134

135

136

Healthy

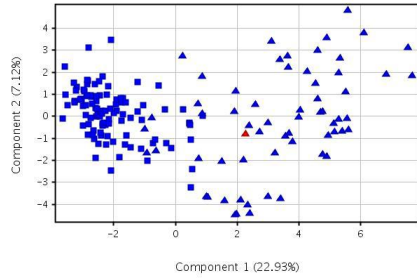

Disease

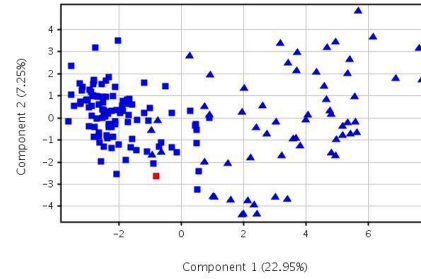

Disease

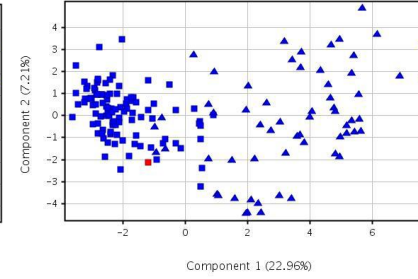

Disease

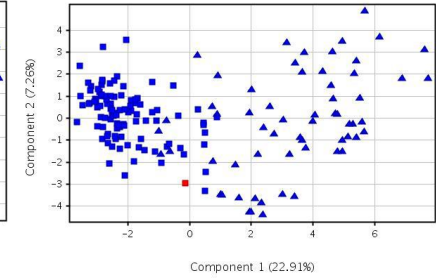

137

138

139

140

Healthy

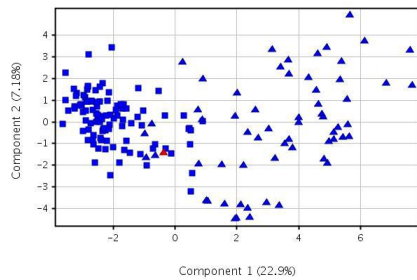

Healthy

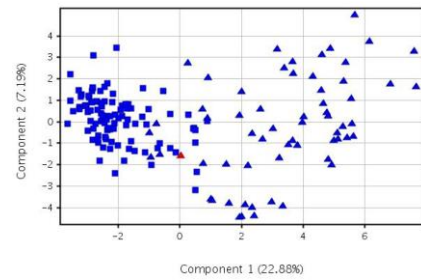

Healthy

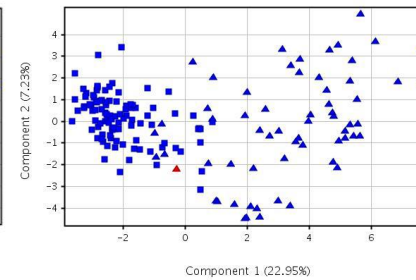

Healthy

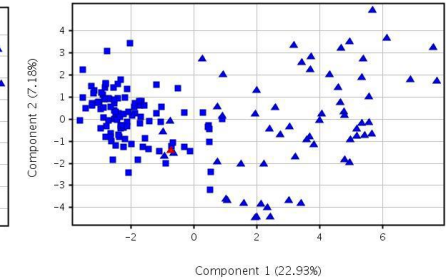

141

142

143

144 **Figure S5:** Summary of pathway analysis of metabolites that were up-regulated in  $\beta$ -thalassemia patients  
145 as compared to healthy controls.

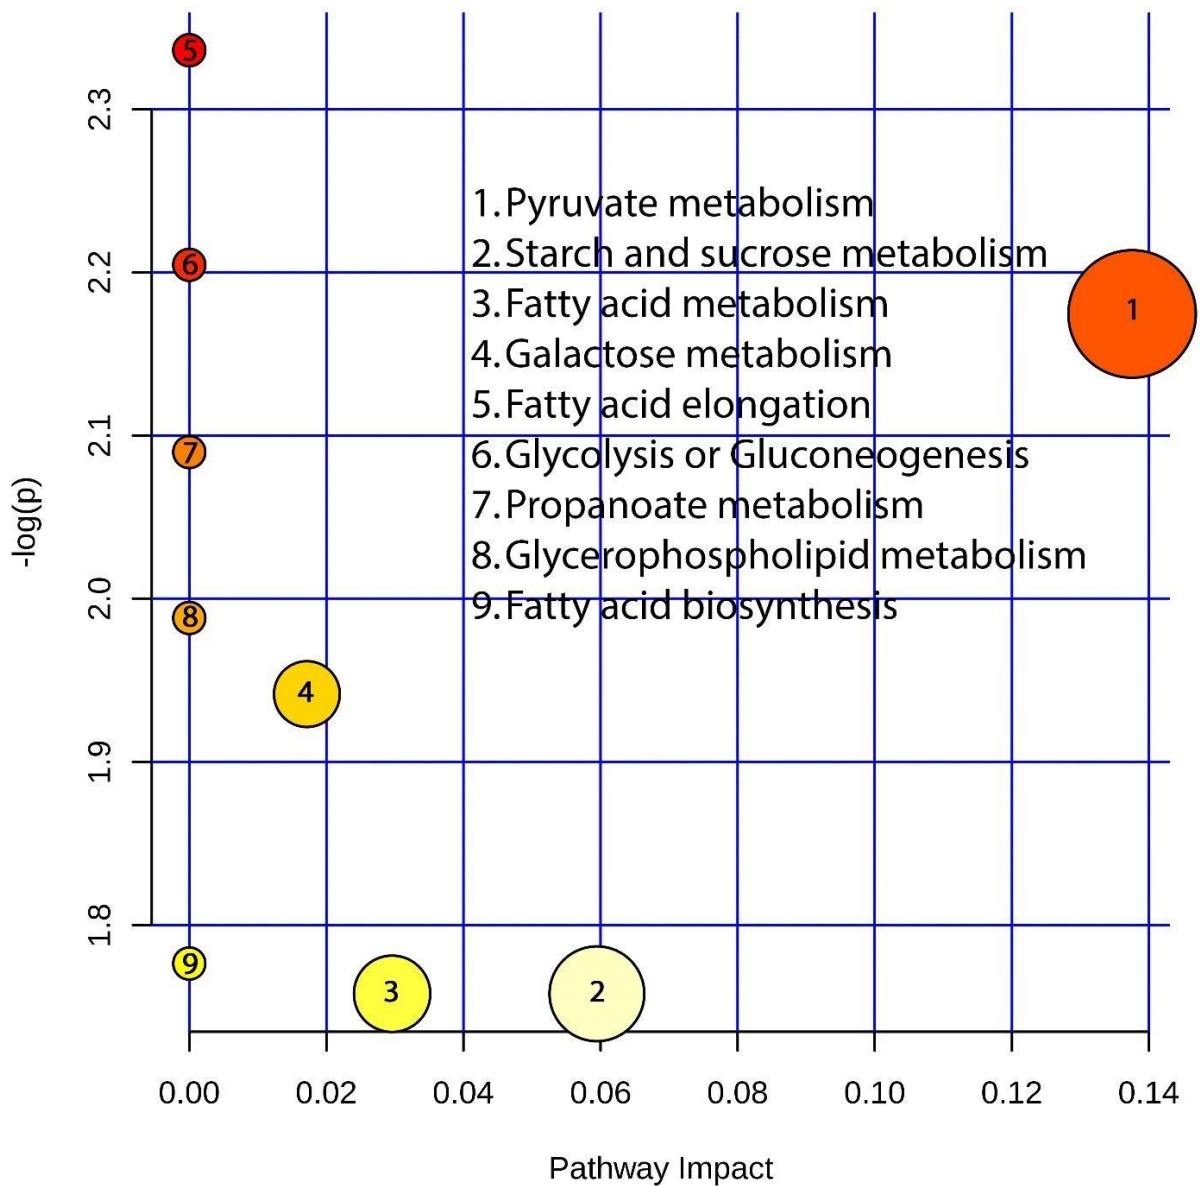

148 **Figure S6:** Summary of pathway analysis of metabolites that were down-regulated in  $\beta$ -thalassemia  
149 patients as compared to healthy controls

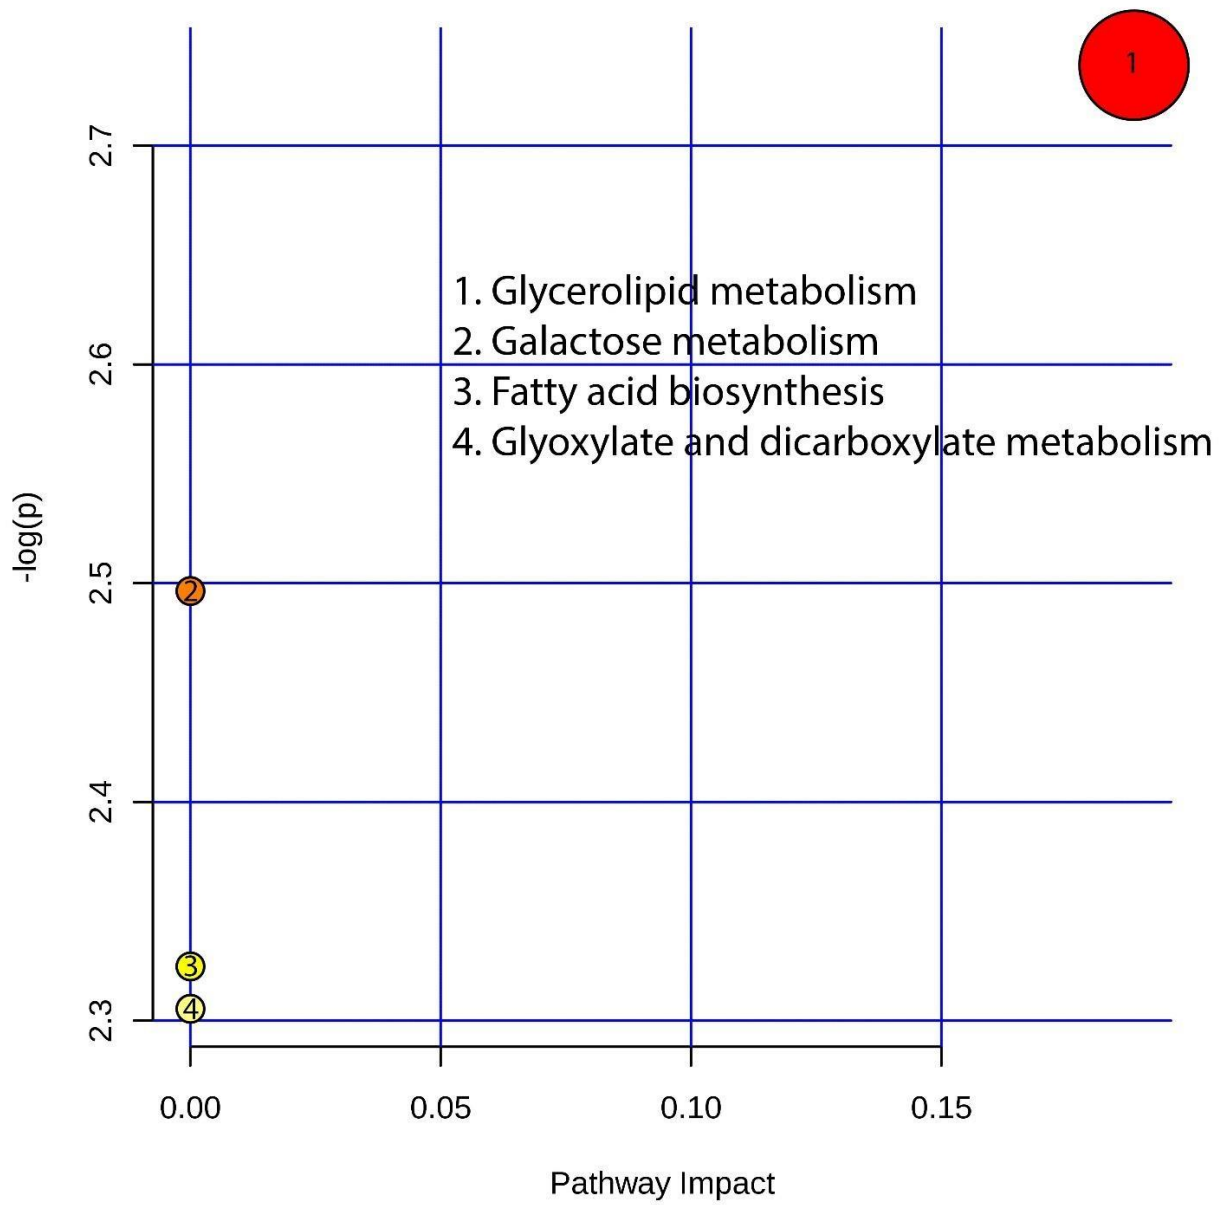





# FATTY ACID BIOSYNTHESIS

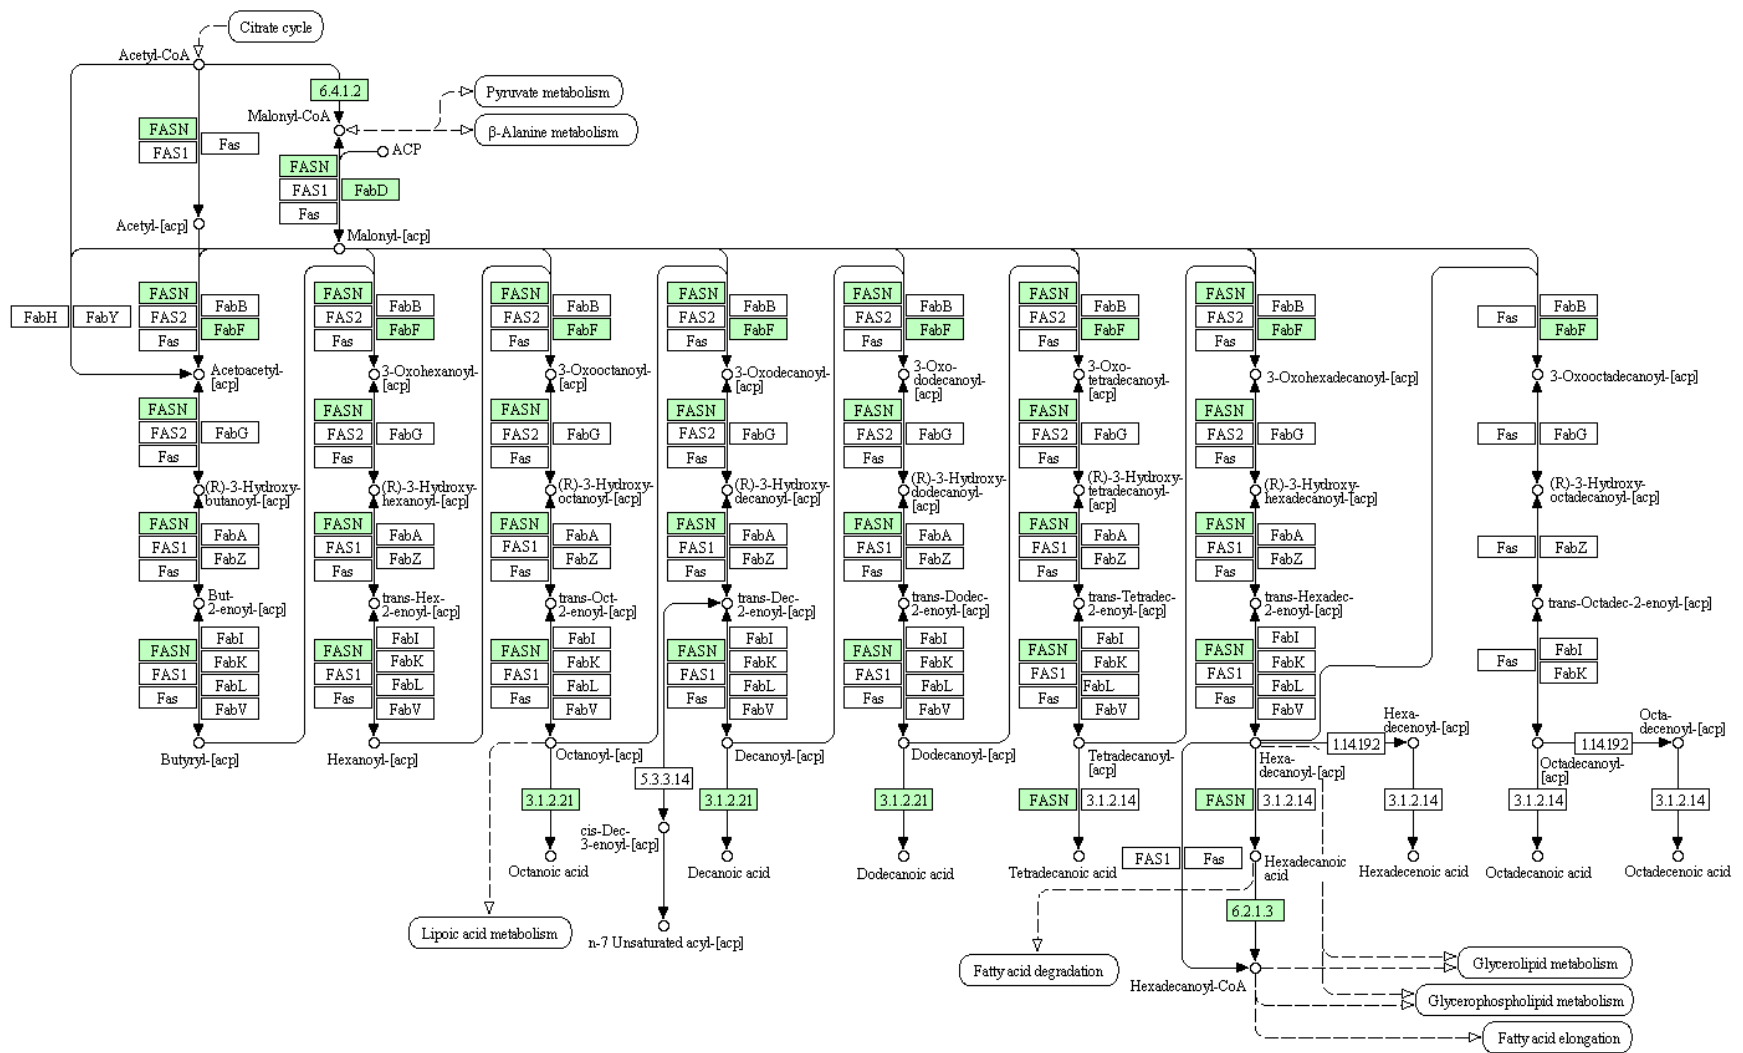



# GLYCEROPHOSPHOLIPID METABOLISM

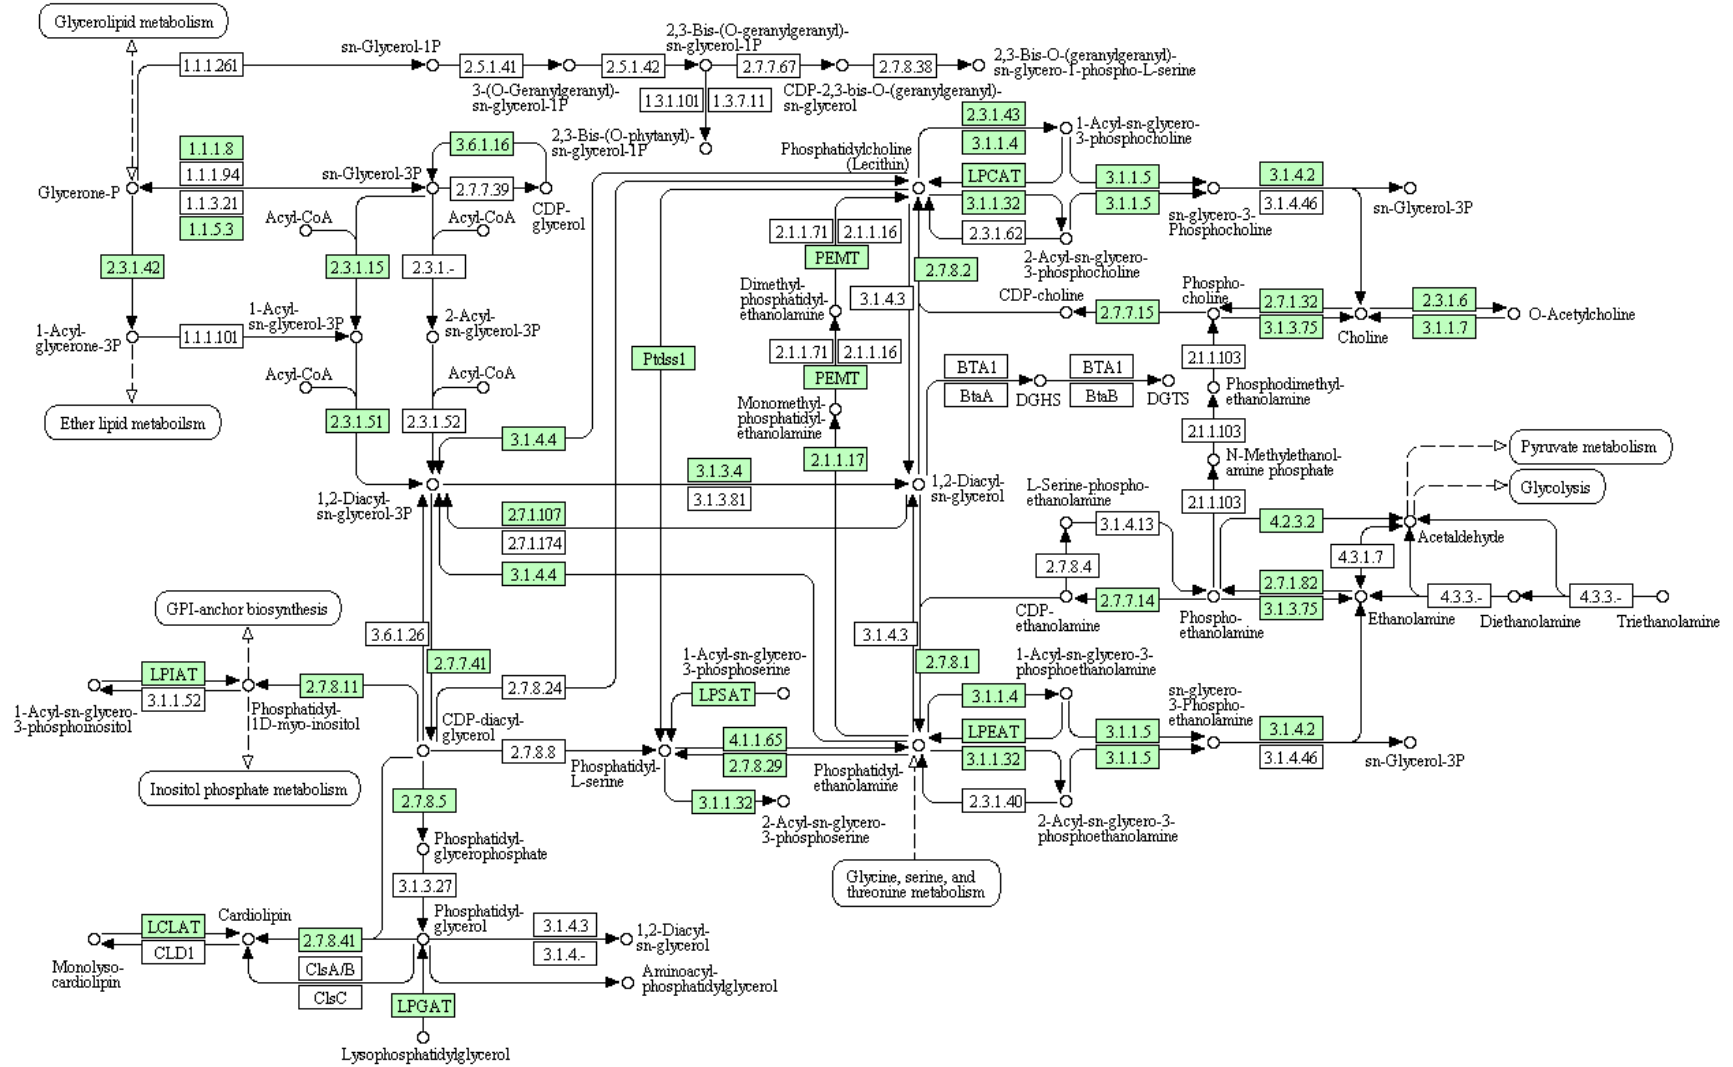

GLYOXYLATE AND DICARBOXYLATE METABOLISM

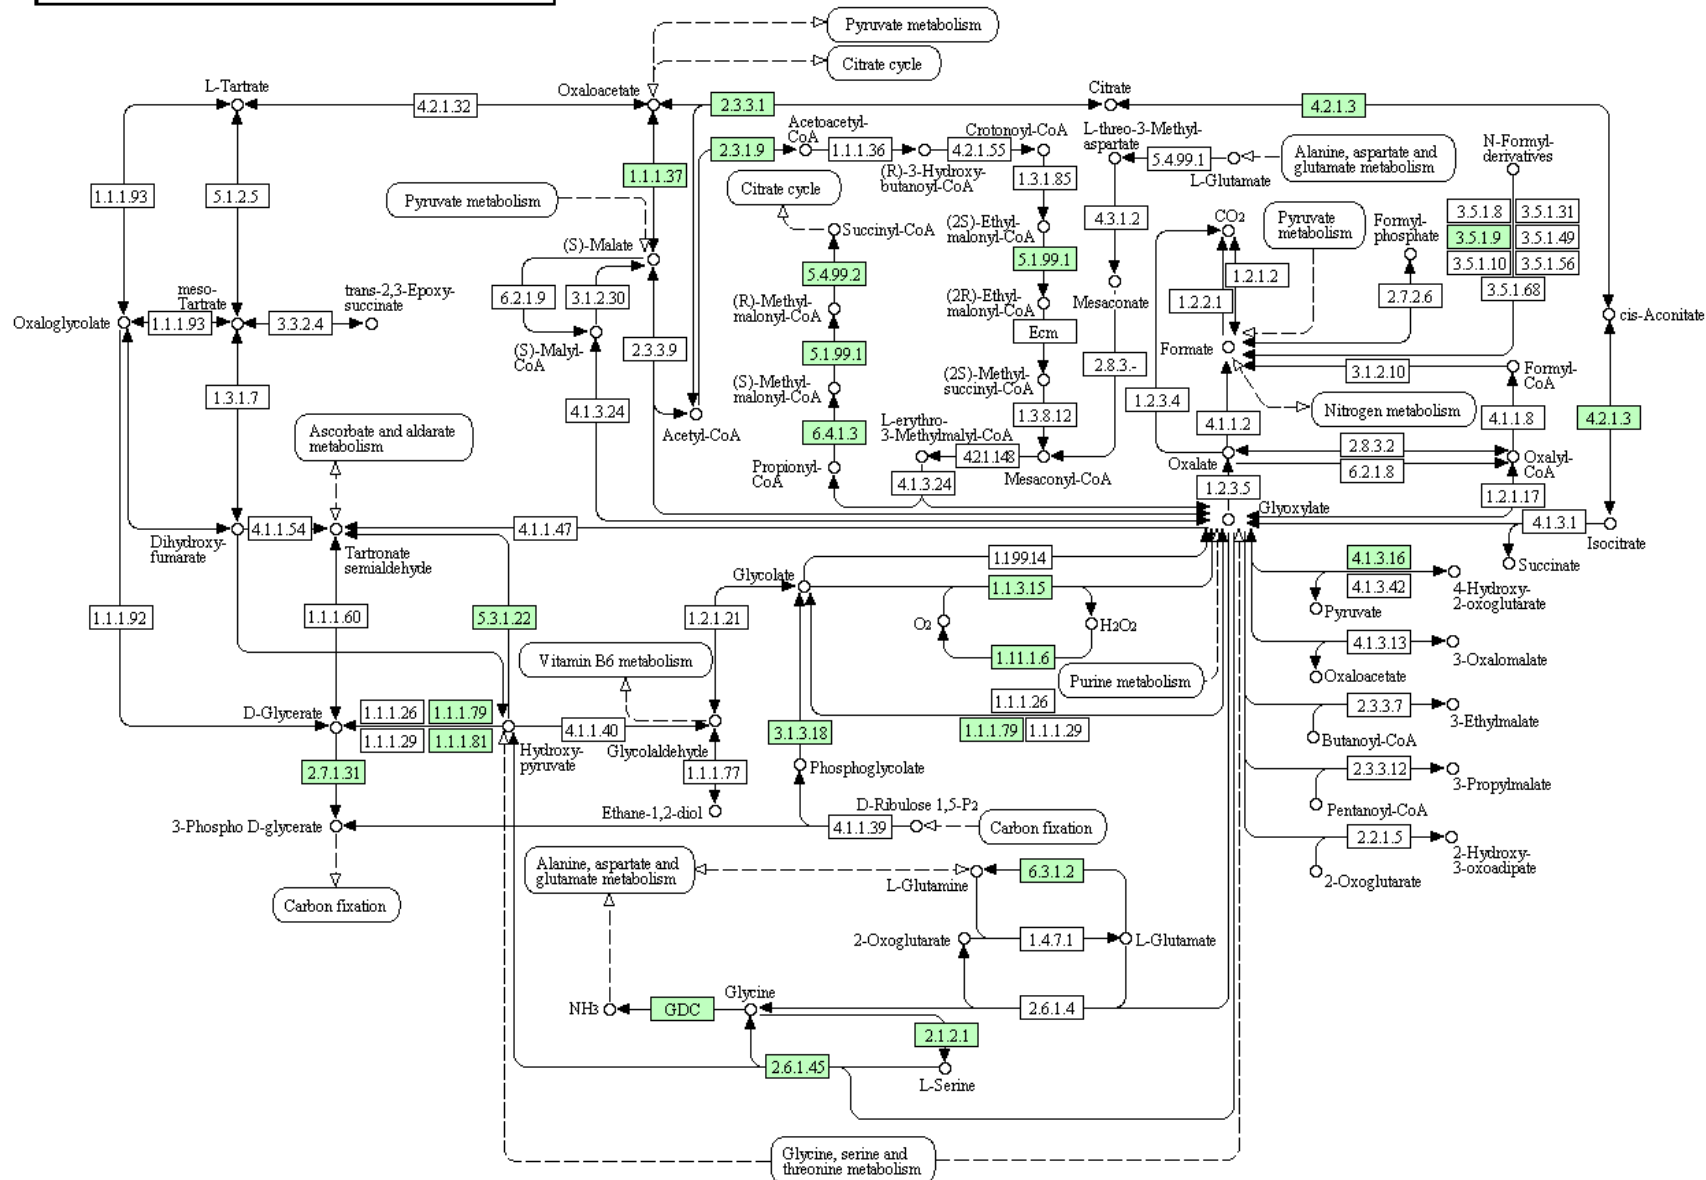





# GLYCEROLIPID METABOLISM

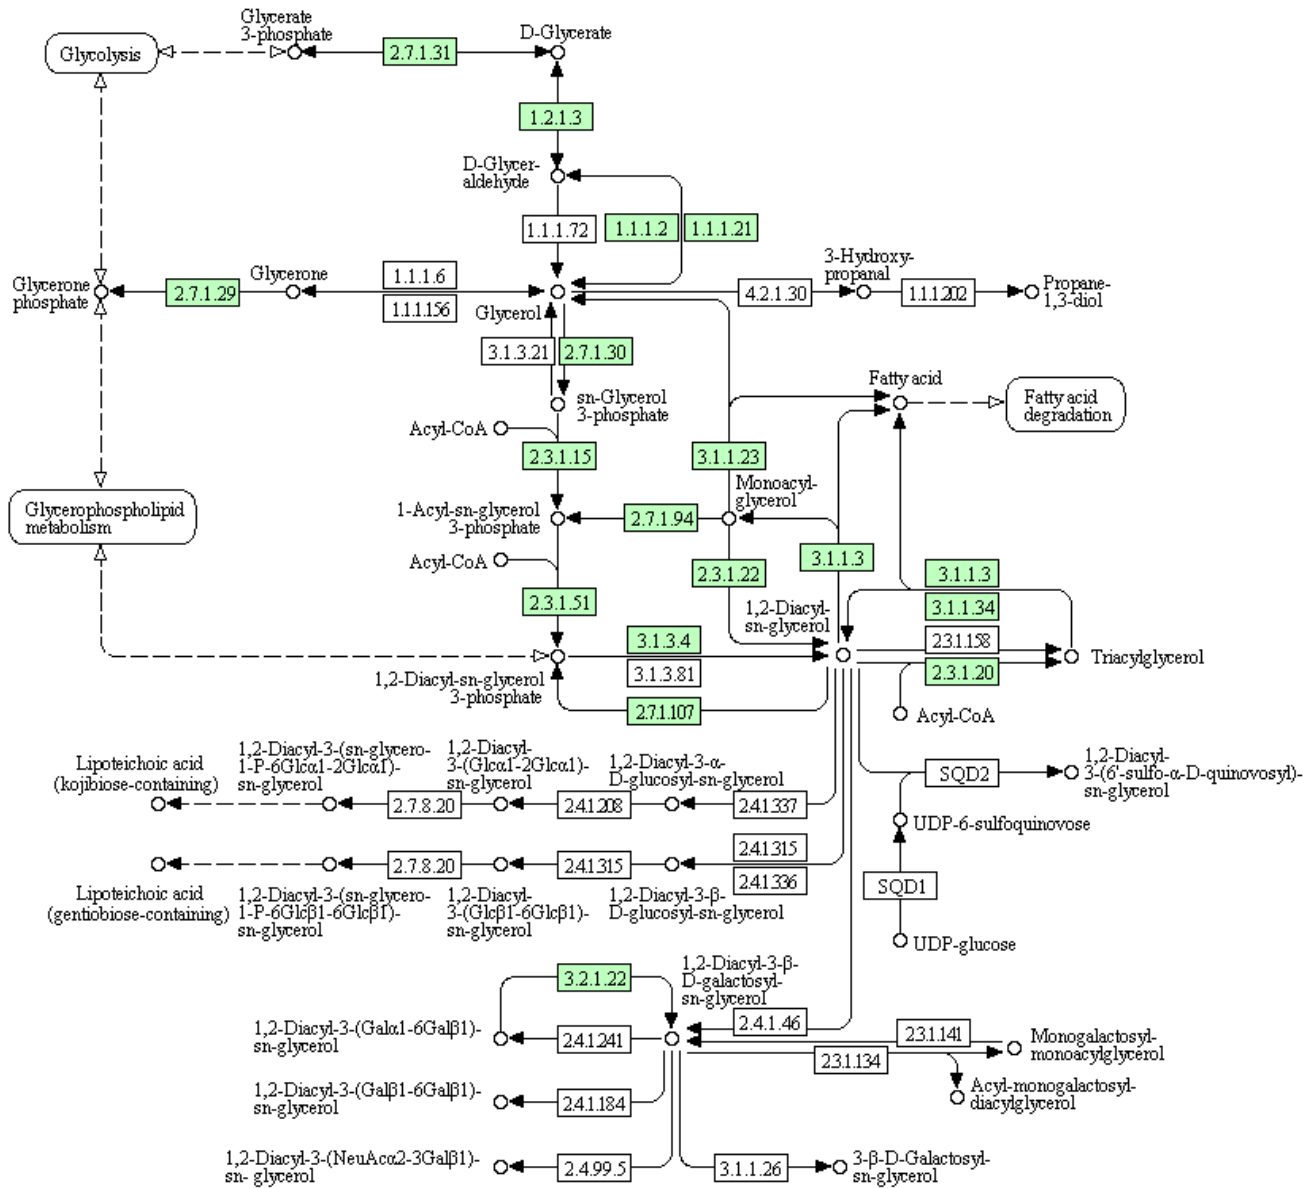

GLYCOLYSIS / GLUCONEOGENESIS

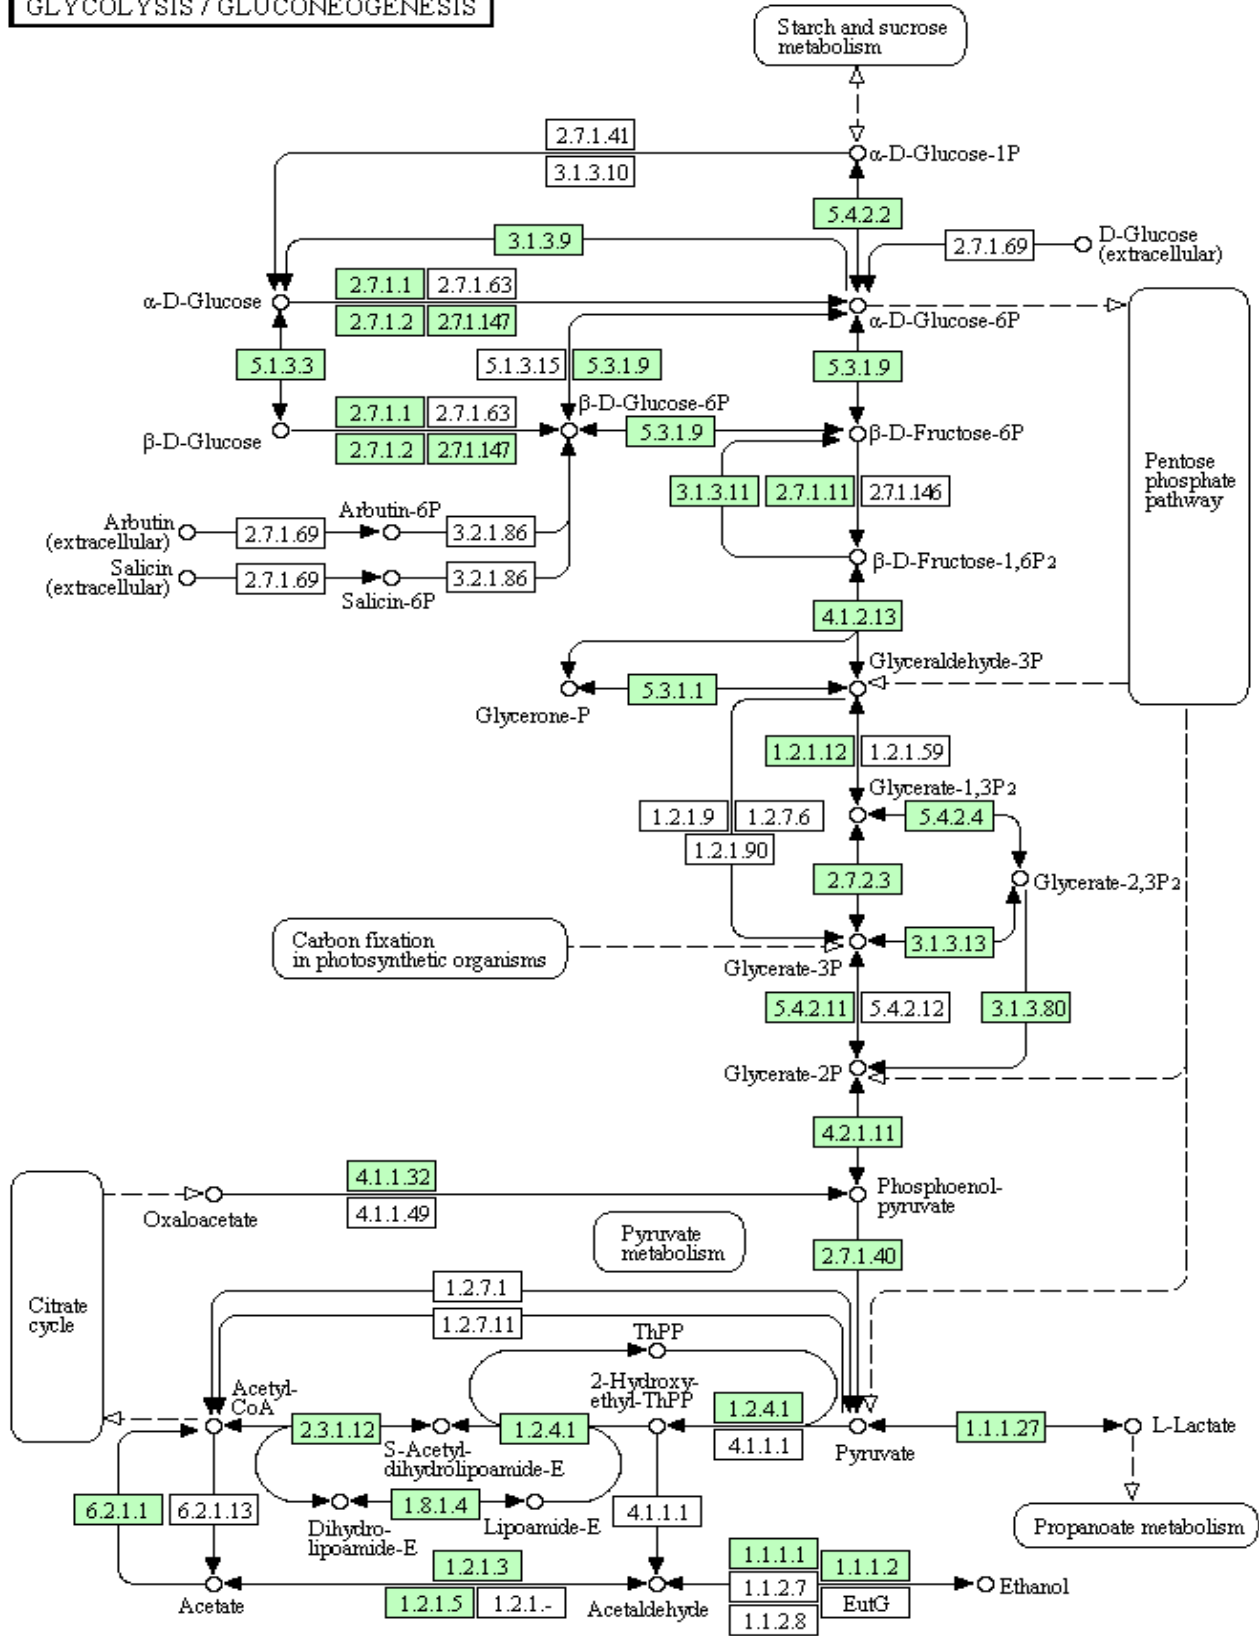

# FATTY ACID DEGRADATION

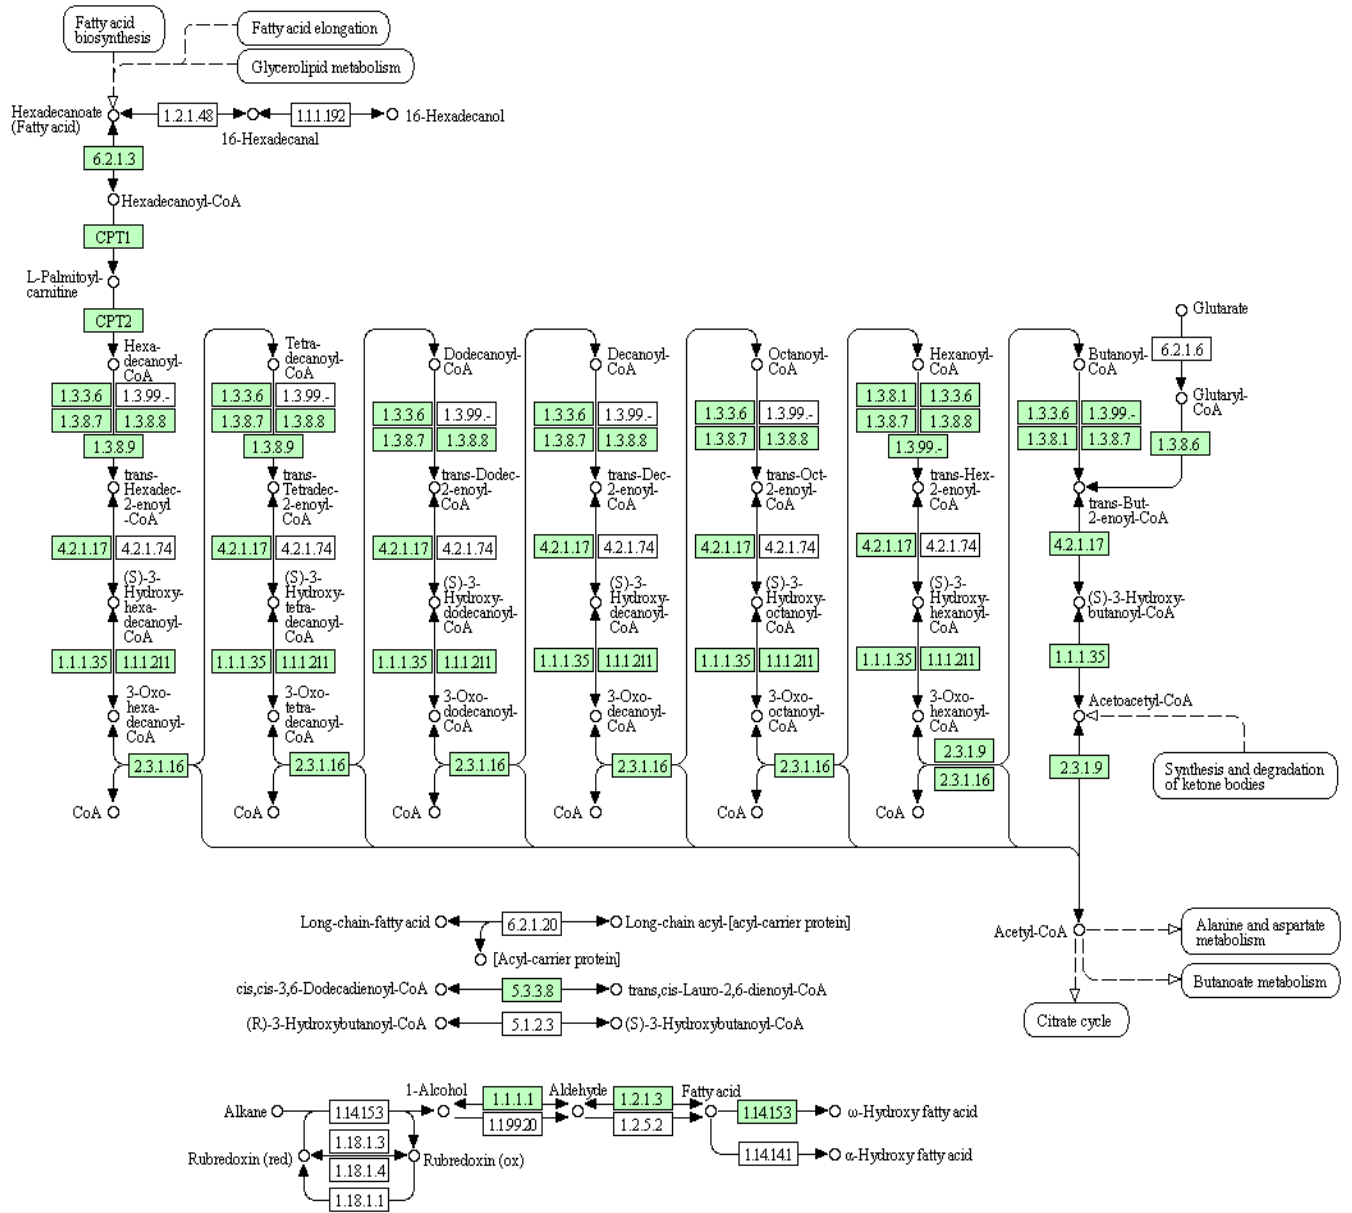

# FATTY ACID ELONGATION

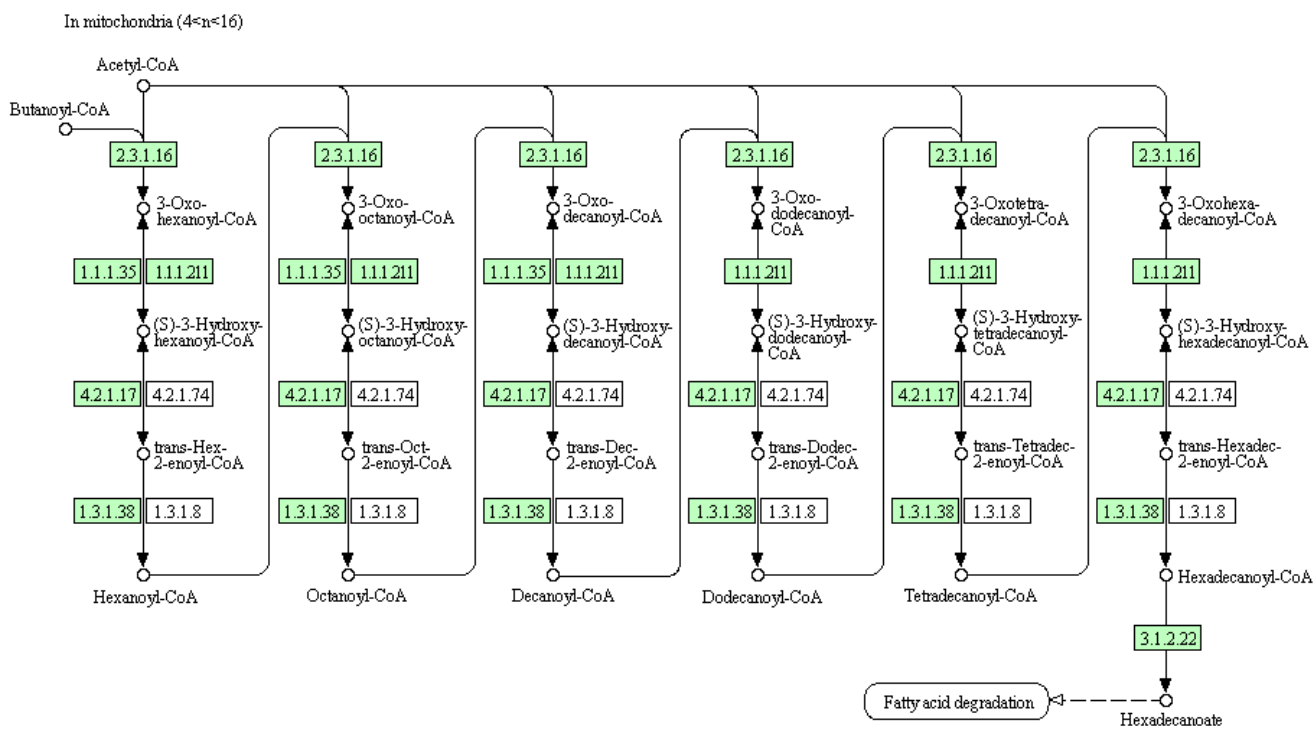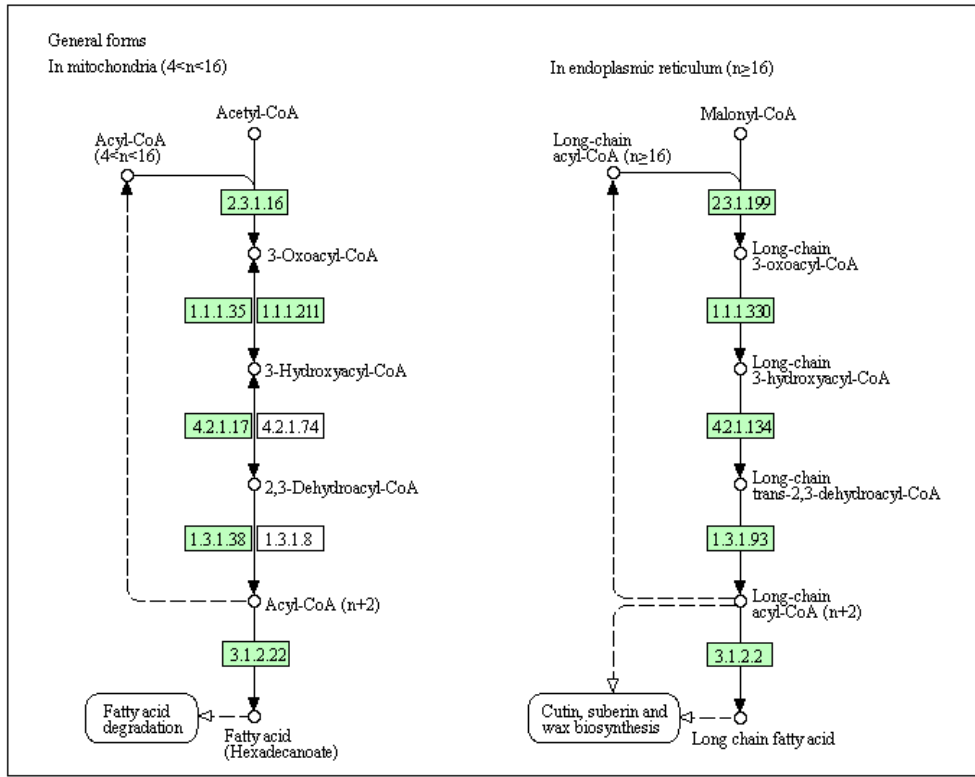

Supplement: srep42249-s1.pdf [file srep42249-s1.pdf]
